# Supplementary material
Source: Springer Nature journal article supplement (https://www.springermedizin.de/resource/supplementary/12913_2012_2477_MOESM1_ESM.pdf/9532074)
Supplement: MOESM1 [file 9532074]

**Enrollment**

Assessed for eligibility  
(n=3935)

- Consent refusal (n = 3253)
- Cannot follow-up, ie. moved (n=239)

Consented for Screening (n=443)

- Excluded (n=289)
- Not meeting inclusion criteria (n=49 ineligible by questionnaire; n=45 <35 T2DM patients; n=18 <4 insulin-eligible patients)
  - Withdraw after consent (n=148)
  - Refused to participate (n=29)

Randomized (n=154)

**Allocation**

Allocated to intervention  
(n=75)

- Received allocated intervention (n=73)
- Did not receive allocated intervention (n=2 physicians did not receive workshop)

Allocated to control  
(n=79)

- Received allocated intervention (n=78)
- Did not receive allocated intervention (n=1 physician did not attend workshop)

**Analysis**

Analyzed (n=73)

- Physician withdrawal (n=3, IPR set to 0)
- Consenting patient data (n=2858)
- Non-consenting patient data (n=2702)

Analyzed (n=78)

- Physician withdrawal (n=3, IPR set to 0)
- Consenting patient data (n=2788)
- Non-consenting patient data (n=3032)
